# Supplementary material for: Sunlight-driven photodegradation of organic pollutants catalyzed by TiO2/(ZnS)x(CuInS2)1−x nanocomposites
Source: Royal Society of Chemistry journal article supplement (doi:10.1039/c2jm30540b), 2012-01-01
Supplement: c2jm30540b.pdf [file c2jm30540b.pdf]

## Electronic Supplementary Information:

### Sunlight-Driven Photodegradation of Organic Pollutants

#### Catalyzed by $\text{TiO}_2/(\text{ZnS})_x(\text{CuInS}_2)_{1-x}$ Nanocomposites

Yuhan Lin,<sup>a</sup> Fang Zhang,<sup>b</sup> Daocheng Pan,<sup>a\*</sup> Hexing Li,<sup>b\*</sup> Yunfeng Lu<sup>c\*</sup>

<sup>a</sup>State Key Laboratory of Rare Earth Resource Utilization, Changchun Institute of Applied Chemistry, Chinese Academy of Sciences, 5625 Renmin Street, Changchun 130022, China;

<sup>b</sup>The Education Ministry Key Lab of Resource Chemistry and Shanghai Key Laboratory of Rare Earth Functional Materials, Shanghai Normal University, Shanghai 200234, China

<sup>c</sup>Department of Chemical Engineering, University of California, Los Angeles, CA, USA, 90095

**Table S1.** Carbon concentration (mol%) of  $\text{TiO}_2/(\text{ZnS})_{0.8}(\text{CuInS}_2)_{0.2}$  nanocomposites before and after sintering with/without water vapor. The data were recorded using the Elementar Analysensysteme (GmbH VarioEL).

|                   | before sintering | $\text{N}_2+\text{H}_2\text{O}$ | $\text{N}_2$ |
|-------------------|------------------|---------------------------------|--------------|
| Content of carbon | 30.80            | 5.697                           | 9.33         |

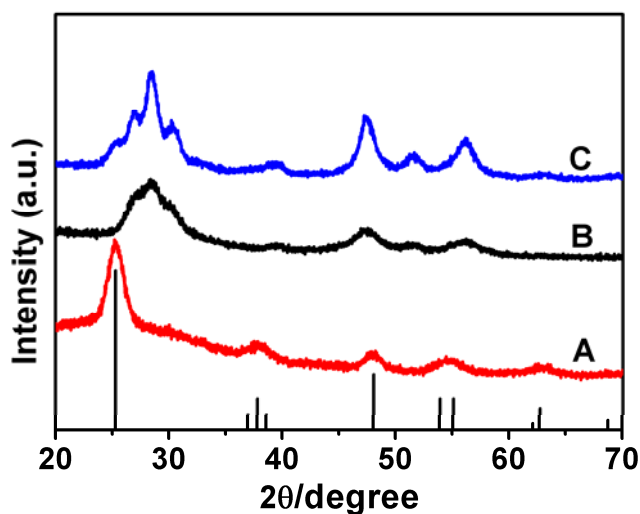

**Figure S1.** XRD patterns of oleic acid-capped TiO<sub>2</sub> (A) and (ZnS)<sub>0.8</sub>(CuInS<sub>2</sub>)<sub>0.2</sub> nanocrystals (B) as well as TiO<sub>2</sub>/(ZnS)<sub>0.8</sub>(CuInS<sub>2</sub>)<sub>0.2</sub> (C) nanocomposites after removal of oleic acid. The vertical lines at the bottom correspond to the standard XRD pattern of anatase TiO<sub>2</sub> (JCPDS No.21-1272).

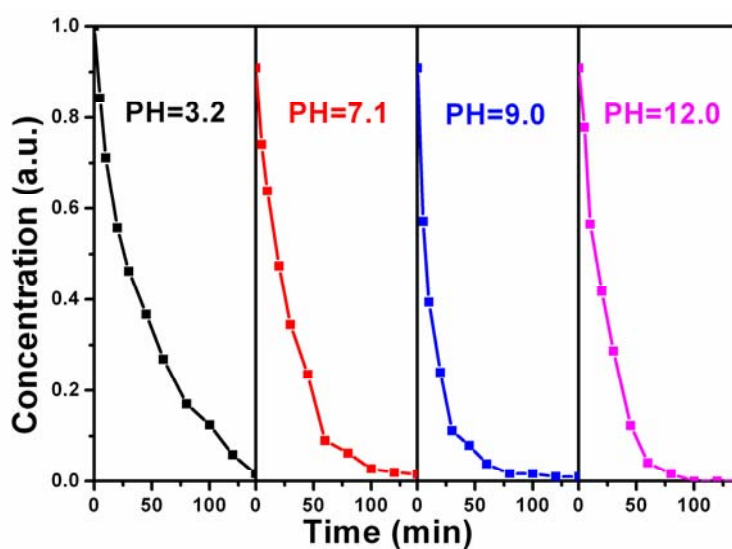

**Figure S2.** Effect of pH value on the degradation efficiency of R6G catalyzed by TiO<sub>2</sub>/(ZnS)<sub>0.8</sub>(CuInS<sub>2</sub>)<sub>0.2</sub> nanocomposites.

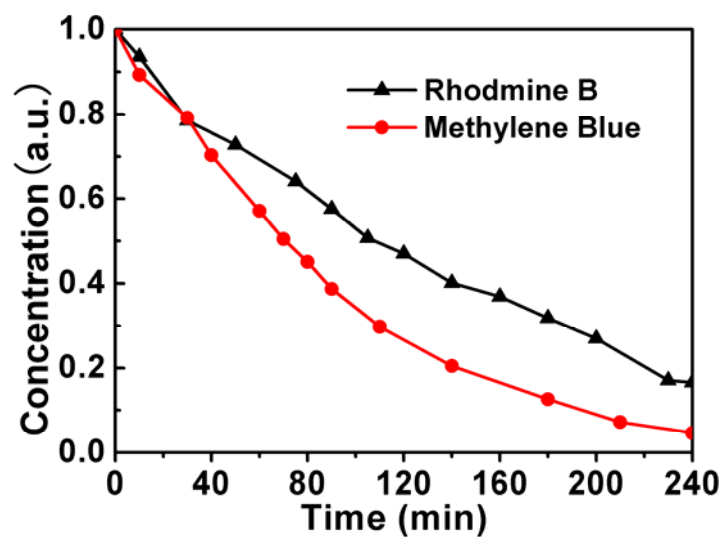

**Figure S3.** Degradation behavior of rhodamine B and methylene blue by  $\text{TiO}_2/(\text{ZnS})_{0.8}(\text{CuInS}_2)_{0.2}$  nanocomposites, individually. 5.0 mg of photocatalyst powder was added to 30 mL of dye (10 mg/L) aqueous solution in each case, and the experiments were performed under visible light. The UV light ( $\lambda < 380$  nm) was blocked by a UV filter.

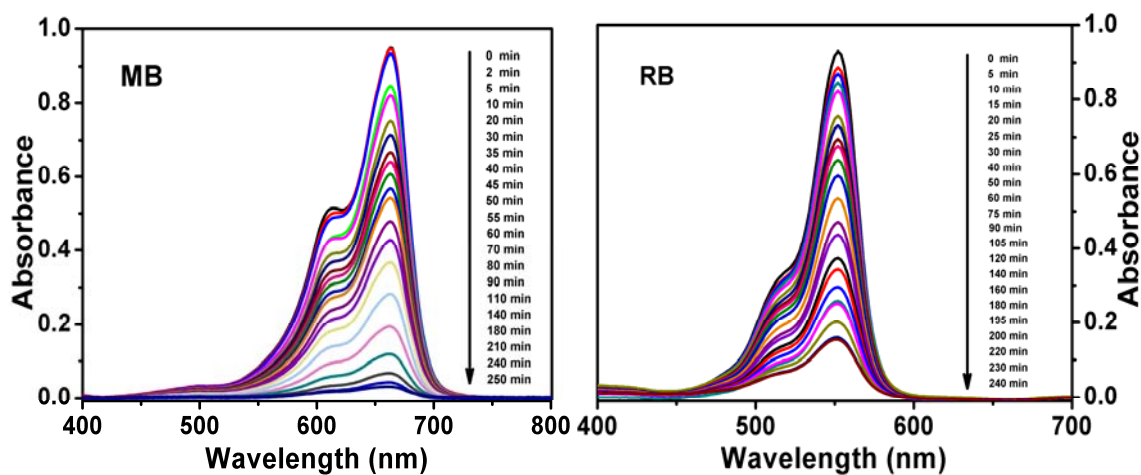

**Figure S4.** UV/vis absorption spectra of methylene blue (MB) and rhodamine B (RB) as a function of irradiation time in the presence of  $\text{TiO}_2/(\text{ZnS})_{0.8}(\text{CuInS}_2)_{0.2}$  nanocomposites.
